# Supplementary material for: Food Group Intake and Micronutrient Adequacy in Adolescent Girls
Source: Nutrients. 2012 Nov 12;4(11):1692–708. doi: 10.3390/nu4111692 (PMC3509514; doi:10.3390/nu4111692)

## Supplementary Materials

**Supplemental Table S1.** Percent of 14–18 year-old girls meeting Estimated Average Requirements (EAR) for micronutrients according to fruit subgroup intake.

|                            | <i>Citrus, melon, berries</i> |                              |                          | <i>p-value</i> |
|----------------------------|-------------------------------|------------------------------|--------------------------|----------------|
|                            | <b>Low <sup>1</sup></b>       | <b>Moderate <sup>1</sup></b> | <b>High <sup>1</sup></b> |                |
|                            | <i>n</i> = 794                | <i>n</i> = 924               | <i>n</i> = 383           |                |
| <b>Vit A (RAE)</b>         | 46.6%                         | 54.7%                        | 63.5%                    | <0.0001        |
| <b>Vit B6 (mg)</b>         | 74.1%                         | 84.0%                        | 89.6%                    | <0.0001        |
| <b>Vit B12 (µg)</b>        | 85.4%                         | 84.2%                        | 83.0%                    | 0.5579         |
| <b>Vit C (mg)</b>          | 48.1%                         | 91.9%                        | 100.0%                   | <0.0001        |
| <b>Vit D (µg)</b>          | 2.4%                          | 2.4%                         | 2.6%                     | 0.9671         |
| <b>Vit E (mg)</b>          | 2.1%                          | 2.1%                         | 3.7%                     | 0.1927         |
| <b>Ca (mg)</b>             | 9.5%                          | 10.5%                        | 17.0%                    | 0.0004         |
| <b>Mg (mg)</b>             | 4.9%                          | 8.4%                         | 18.8%                    | <0.0001        |
| <b>Zn (mg)</b>             | 67.8%                         | 71.1%                        | 71.5%                    | 0.2395         |
| <b>Iron (mg)</b>           | 84.1%                         | 90.5%                        | 94.0%                    | <0.0001        |
| <b>P (mg)</b>              | 38.4%                         | 43.7%                        | 49.6%                    | 0.0010         |
| <b>K (mg) <sup>2</sup></b> | 0.0%                          | 0.2%                         | 0.0%                     | 0.2794         |

  

|                            | <i>Other fruit</i>      |                              |                          | <i>p-value</i> |
|----------------------------|-------------------------|------------------------------|--------------------------|----------------|
|                            | <b>Low <sup>3</sup></b> | <b>Moderate <sup>3</sup></b> | <b>High <sup>3</sup></b> |                |
|                            | <i>n</i> = 958          | <i>n</i> = 839               | <i>n</i> = 304           |                |
| <b>Vit A (RAE)</b>         | 44.1%                   | 57.1%                        | 71.4%                    | <0.0001        |
| <b>Vit B6 (mg)</b>         | 75.0%                   | 84.9%                        | 91.1%                    | <0.0001        |
| <b>Vit B12 (µg)</b>        | 84.5%                   | 83.7%                        | 86.5%                    | 0.5036         |
| <b>Vit C (mg)</b>          | 65.9%                   | 83.2%                        | 93.8%                    | <0.0001        |
| <b>Vit D (µg)</b>          | 2.4%                    | 1.6%                         | 4.9%                     | 0.0045         |
| <b>Vit E (mg)</b>          | 2.4%                    | 2.2%                         | 3.0%                     | 0.7256         |
| <b>Ca (mg)</b>             | 8.0%                    | 11.3%                        | 21.4%                    | <0.0001        |
| <b>Mg (mg)</b>             | 5.0%                    | 8.6%                         | 22.7%                    | <0.0001        |
| <b>Zn (mg)</b>             | 67.9%                   | 69.0%                        | 79.0%                    | 0.0009         |
| <b>Iron (mg)</b>           | 82.8%                   | 92.5%                        | 97.0%                    | <0.0001        |
| <b>P (mg)</b>              | 38.1%                   | 43.9%                        | 54.6%                    | <0.0001        |
| <b>K (mg) <sup>2</sup></b> | 0.1%                    | 0.0%                         | 0.3%                     | 0.2788         |

<sup>1</sup> Low, moderate, high intakes: <10%, 10%–<40%, ≥40% of the recommended 3 servings of total fruit/day derived from citrus, melon, berries; <sup>2</sup> Percent meeting AI for potassium (K); <sup>3</sup> Low, moderate, high intakes: <10%, 10%–<40%, ≥40% of the recommended 3 servings of total fruit/day derived from other fruit.

**Supplemental Table S2.** Percent of 14–18 year-old girls meeting Estimated Average Requirements (EAR) for micronutrients according to vegetable subgroup intake.

| <i>Tomatoes, dark green, deep yellow and orange vegetables</i> |                         |                              |                          |                |
|----------------------------------------------------------------|-------------------------|------------------------------|--------------------------|----------------|
|                                                                | <b>Low <sup>1</sup></b> | <b>Moderate <sup>1</sup></b> | <b>High <sup>1</sup></b> | <b>p-value</b> |
|                                                                | <i>n = 1085</i>         | <i>n = 730</i>               | <i>n = 286</i>           |                |
| <b>Vit A (RAE)</b>                                             | 41.4%                   | 60.1%                        | 80.4%                    | <0.0001        |
| <b>Vit B6 (mg)</b>                                             | 74.4%                   | 87.5%                        | 91.3%                    | <0.0001        |
| <b>Vit B12 (µg)</b>                                            | 80.4%                   | 90.0%                        | 85.7%                    | <0.0001        |
| <b>Vit C (mg)</b>                                              | 68.2%                   | 84.1%                        | 90.9%                    | <0.0001        |
| <b>Vit D (µg)</b>                                              | 2.7%                    | 1.8%                         | 3.2%                     | 0.3346         |
| <b>Vit E (mg)</b>                                              | 1.8%                    | 2.2%                         | 5.2%                     | 0.0024         |
| <b>Ca (mg)</b>                                                 | 8.5%                    | 12.9%                        | 17.8%                    | <0.0001        |
| <b>Mg (mg)</b>                                                 | 5.3%                    | 9.3%                         | 22.4%                    | <0.0001        |
| <b>Zn (mg)</b>                                                 | 60.3%                   | 80.3%                        | 80.1%                    | <0.0001        |
| <b>Iron (mg)</b>                                               | 82.2%                   | 95.6%                        | 95.8%                    | <0.0001        |
| <b>P (mg)</b>                                                  | 32.1%                   | 51.0%                        | 62.6%                    | <0.0001        |
| <b>K (mg) <sup>2</sup></b>                                     | 0.2%                    | 0.0%                         | 0.0%                     | 0.3917         |
| <i>Other non-starchy vegetables</i>                            |                         |                              |                          |                |
|                                                                | <b>Low <sup>3</sup></b> | <b>Moderate <sup>3</sup></b> | <b>High <sup>3</sup></b> | <b>p-value</b> |
|                                                                | <i>n = 1058</i>         | <i>n = 755</i>               | <i>n = 288</i>           |                |
| <b>Vit A (RAE)</b>                                             | 46.1%                   | 58.0%                        | 66.7%                    | <0.0001        |
| <b>Vit B6 (mg)</b>                                             | 75.2%                   | 85.3%                        | 92.7%                    | <0.0001        |
| <b>Vit B12 (µg)</b>                                            | 82.9%                   | 86.1%                        | 85.8%                    | 0.1436         |
| <b>Vit C (mg)</b>                                              | 71.3%                   | 81.1%                        | 86.1%                    | <0.0001        |
| <b>Vit D (µg)</b>                                              | 2.7%                    | 2.1%                         | 2.4%                     | 0.7721         |
| <b>Vit E (mg)</b>                                              | 1.6%                    | 2.4%                         | 5.2%                     | 0.0018         |
| <b>Ca (mg)</b>                                                 | 11.3%                   | 10.3%                        | 13.5%                    | 0.3404         |
| <b>Mg (mg)</b>                                                 | 6.3%                    | 8.2%                         | 20.8%                    | <0.0001        |
| <b>Zn (mg)</b>                                                 | 63.6%                   | 75.2%                        | 79.2%                    | <0.0001        |
| <b>Iron (mg)</b>                                               | 84.0%                   | 91.9%                        | 97.6%                    | <0.0001        |
| <b>P (mg)</b>                                                  | 36.4%                   | 46.1%                        | 57.6%                    | <0.0001        |
| <b>K (mg) <sup>2</sup></b>                                     | 0.1%                    | 0.0%                         | 0.4%                     | 0.2667         |
| <i>Potatoes &amp; other starchy vegetables</i>                 |                         |                              |                          |                |
|                                                                | <b>Low <sup>4</sup></b> | <b>Moderate <sup>4</sup></b> | <b>High <sup>4</sup></b> | <b>p-value</b> |
|                                                                | <i>n = 472</i>          | <i>n = 1043</i>              | <i>n = 586</i>           |                |
| <b>Vit A (RAE)</b>                                             | 55.5%                   | 53.9%                        | 50.2%                    | 0.1859         |
| <b>Vit B6 (mg)</b>                                             | 64.8%                   | 81.1%                        | 94.7%                    | <0.0001        |
| <b>Vit B12 (ug)</b>                                            | 78.6%                   | 84.4%                        | 89.3%                    | <0.0001        |
| <b>Vit C (mg)</b>                                              | 71.4%                   | 76.4%                        | 81.9%                    | 0.0003         |
| <b>Vit D (µg)</b>                                              | 3.4%                    | 2.2%                         | 2.1%                     | 0.2982         |
| <b>Vit E (mg)</b>                                              | 1.5%                    | 1.3%                         | 5.1%                     | <0.0001        |
| <b>Ca (mg)</b>                                                 | 14.6%                   | 11.0%                        | 9.0%                     | 0.0162         |
| <b>Mg (mg)</b>                                                 | 8.9%                    | 6.8%                         | 13.0%                    | 0.0002         |
| <b>Zn (mg)</b>                                                 | 56.6%                   | 69.7%                        | 81.1%                    | <0.0001        |
| <b>Iron (mg)</b>                                               | 82.8%                   | 89.2%                        | 92.7%                    | <0.0001        |
| <b>P (mg)</b>                                                  | 33.5%                   | 41.2%                        | 53.1%                    | <0.0001        |
| <b>K (mg) <sup>2</sup></b>                                     | 0.2%                    | 0.0%                         | 0.2%                     | 0.3642         |

<sup>1</sup> Low, moderate, high: <10%, 10%–<20%, ≥20% of the recommended 5 servings of total vegetable/day derived from tomatoes, dark green, deep yellow and orange vegetables; <sup>2</sup> Percent meeting AI for potassium (K);

<sup>3</sup> Low, moderate, high: <10%, 10%–<20%, ≥20% of the recommended 5 servings of total vegetable/day derived from other non-starchy vegetables; <sup>4</sup> Low, moderate, high: <10%, 10%–<30%, ≥30% of the recommended 5 servings of total vegetable/day derived from potatoes & other starchy vegetables subgroup.

**Supplemental Table S3.** Percent of 14–18 year-old girls meeting Estimated Average Requirements (EAR) for micronutrients according to dairy subgroup intake.

|                            | <i>Milk subgroup</i>                |                              |                          | <i>p-value</i> |
|----------------------------|-------------------------------------|------------------------------|--------------------------|----------------|
|                            | <b>Low <sup>1</sup></b>             | <b>Moderate <sup>1</sup></b> | <b>High <sup>1</sup></b> |                |
|                            | <i>n</i> = 830                      | <i>n</i> = 862               | <i>n</i> = 409           |                |
| <b>Vit A (RAE)</b>         | 23.3%                               | 64.3%                        | 90.7%                    | <0.0001        |
| <b>Vit B6 (mg)</b>         | 70.5%                               | 85.6%                        | 93.9%                    | <0.0001        |
| <b>Vit B12 (µg)</b>        | 70.5%                               | 91.0%                        | 99.0%                    | <0.0001        |
| <b>Vit C (mg)</b>          | 74.5%                               | 78.4%                        | 78.2%                    | 0.1161         |
| <b>Vit D (µg)</b>          | 0.1%                                | 0.0%                         | 12.2%                    | <0.0001        |
| <b>Vit E (mg)</b>          | 1.9%                                | 3.0%                         | 2.0%                     | 0.2795         |
| <b>Ca (mg)</b>             | 0.6%                                | 4.6%                         | 46.9%                    | <0.0001        |
| <b>Mg (mg)</b>             | 2.1%                                | 8.0%                         | 25.2%                    | <0.0001        |
| <b>Zn (mg)</b>             | 57.2%                               | 72.5%                        | 90.2%                    | <0.0001        |
| <b>Iron (mg)</b>           | 82.2%                               | 91.9%                        | 95.4%                    | <0.0001        |
| <b>P (mg)</b>              | 18.3%                               | 44.7%                        | 88.5%                    | <0.0001        |
| <b>K (mg) <sup>2</sup></b> | 0.1%                                | 0.0%                         | 0.2%                     | 0.3993         |
|                            | <i>Cheese &amp; yogurt subgroup</i> |                              |                          | <i>p-value</i> |
|                            | <b>Low <sup>3</sup></b>             | <b>Moderate <sup>3</sup></b> | <b>High <sup>3</sup></b> |                |
|                            | <i>n</i> = 452                      | <i>n</i> = 1202              | <i>n</i> = 447           |                |
| <b>Vit A (RAE)</b>         | 42.9%                               | 52.8%                        | 64.7%                    | <0.0001        |
| <b>Vit B6 (mg)</b>         | 73.9%                               | 82.0%                        | 86.6%                    | <0.0001        |
| <b>Vit B12 (µg)</b>        | 74.8%                               | 84.9%                        | 92.8%                    | <0.0001        |
| <b>Vit C (mg)</b>          | 70.4%                               | 77.7%                        | 81.0%                    | 0.0004         |
| <b>Vit D (µg)</b>          | 2.9%                                | 2.4%                         | 2.0%                     | 0.7016         |
| <b>Vit E (mg)</b>          | 3.5%                                | 2.0%                         | 2.2%                     | 0.1812         |
| <b>Ca (mg)</b>             | 4.7%                                | 8.1%                         | 26.6%                    | <0.0001        |
| <b>Mg (mg)</b>             | 6.9%                                | 8.3%                         | 13.0%                    | 0.0027         |
| <b>Zn (mg)</b>             | 54.0%                               | 68.8%                        | 89.0%                    | <0.0001        |
| <b>Iron (mg)</b>           | 79.9%                               | 89.4%                        | 95.8%                    | <0.0001        |
| <b>P (mg)</b>              | 20.8%                               | 40.1%                        | 72.3%                    | <0.0001        |
| <b>K (mg) <sup>2</sup></b> | 0.4%                                | 0.0%                         | 0.0%                     | 0.0259         |

<sup>1</sup> Low, moderate, high intakes: <20%, 20%–<50%, ≥50% of the recommended 3 servings of total dairy/day derived from milk; <sup>2</sup> Percent meeting AI for potassium (K); <sup>3</sup> Low, moderate, high intakes: <10%, 10%–<30%, ≥30% of the recommended 3 servings of total dairy/day derived from cheese and yogurt.

**Supplemental Table S4.** Percent of 14–18 year-old girls meeting Estimated Average Requirements (EAR) for micronutrients according to meat subgroup intake.

|                                      | <i>Red meat</i>         |                              |                          | <i>p-value</i> |
|--------------------------------------|-------------------------|------------------------------|--------------------------|----------------|
|                                      | <b>Low <sup>1</sup></b> | <b>Moderate <sup>1</sup></b> | <b>High <sup>1</sup></b> |                |
|                                      | <i>n = 557</i>          | <i>n = 811</i>               | <i>n = 733</i>           |                |
| <b>Vit A (RAE)</b>                   | 56.7%                   | 51.5%                        | 52.4%                    | 0.1435         |
| <b>Vit B6 (mg)</b>                   | 68.4%                   | 80.3%                        | 92.1%                    | <0.0001        |
| <b>Vit B12 (µg)</b>                  | 64.1%                   | 86.2%                        | 98.0%                    | <0.0001        |
| <b>Vit C (mg)</b>                    | 72.2%                   | 75.0%                        | 82.4%                    | <0.0001        |
| <b>Vit D (µg)</b>                    | 3.8%                    | 2.0%                         | 1.9%                     | 0.0557         |
| <b>Vit E (mg)</b>                    | 1.3%                    | 2.0%                         | 3.7%                     | 0.0113         |
| <b>Ca (mg)</b>                       | 13.1%                   | 9.6%                         | 11.7%                    | 0.1198         |
| <b>Mg (mg)</b>                       | 9.2%                    | 6.7%                         | 11.5%                    | 0.0044         |
| <b>Zn (mg)</b>                       | 41.3%                   | 67.3%                        | 94.5%                    | <0.0001        |
| <b>Iron (mg)</b>                     | 84.6%                   | 86.1%                        | 94.8%                    | <0.0001        |
| <b>P (mg)</b>                        | 32.0%                   | 35.1%                        | 59.5%                    | <0.0001        |
| <b>K (mg) <sup>2</sup></b>           | 0.2%                    | 0.0%                         | 0.1%                     | 0.5167         |
| <i>White meat (poultry and fish)</i> |                         |                              |                          |                |
|                                      | <b>Low <sup>3</sup></b> | <b>Moderate <sup>3</sup></b> | <b>High <sup>3</sup></b> | <i>p-value</i> |
|                                      | <i>n = 1022</i>         | <i>n = 671</i>               | <i>n = 408</i>           |                |
| <b>Vit A (RAE)</b>                   | 53.5%                   | 54.1%                        | 51.0%                    | 0.5864         |
| <b>Vit B6 (mg)</b>                   | 73.6%                   | 86.7%                        | 91.4%                    | <0.0001        |
| <b>Vit B12 (µg)</b>                  | 81.6%                   | 86.9%                        | 87.5%                    | 0.0022         |
| <b>Vit C (mg)</b>                    | 73.2%                   | 80.2%                        | 80.4%                    | 0.0006         |
| <b>Vit D (µg)</b>                    | 2.6%                    | 2.4%                         | 2.0%                     | 0.7487         |
| <b>Vit E (mg)</b>                    | 1.7%                    | 1.9%                         | 4.9%                     | 0.0009         |
| <b>Ca (mg)</b>                       | 12.9%                   | 10.0%                        | 9.3%                     | 0.0661         |
| <b>Mg (mg)</b>                       | 8.0%                    | 7.9%                         | 13.2%                    | 0.0038         |
| <b>Zn (mg)</b>                       | 64.2%                   | 72.9%                        | 79.4%                    | <0.0001        |
| <b>Iron (mg)</b>                     | 85.6%                   | 91.7%                        | 91.7%                    | <0.0001        |
| <b>P (mg)</b>                        | 39.8%                   | 43.1%                        | 49.8%                    | 0.0028         |
| <b>K (mg) <sup>2</sup></b>           | 0.2%                    | 0.0%                         | 0.0%                     | 0.3476         |
| <i>Soy, nuts, legumes, eggs</i>      |                         |                              |                          |                |
|                                      | <b>Low <sup>4</sup></b> | <b>Moderate <sup>4</sup></b> | <b>High <sup>4</sup></b> | <i>p-value</i> |
|                                      | <i>n = 1144</i>         | <i>n = 687</i>               | <i>n = 270</i>           |                |
| <b>Vit A (RAE)</b>                   | 46.8%                   | 60.3%                        | 62.6%                    | <0.0001        |
| <b>Vit B6 (mg)</b>                   | 77.5%                   | 85.4%                        | 86.3%                    | <0.0001        |
| <b>Vit B12 (µg)</b>                  | 80.9%                   | 89.4%                        | 87.0%                    | <0.0001        |
| <b>Vit C (mg)</b>                    | 73.6%                   | 81.1%                        | 79.6%                    | 0.0006         |
| <b>Vit D (µg)</b>                    | 2.0%                    | 2.3%                         | 4.4%                     | 0.0638         |
| <b>Vit E (mg)</b>                    | 1.1%                    | 1.8%                         | 9.6%                     | <0.0001        |
| <b>Ca (mg)</b>                       | 9.4%                    | 12.1%                        | 17.4%                    | 0.0006         |
| <b>Mg (mg)</b>                       | 4.2%                    | 10.3%                        | 25.9%                    | <0.0001        |
| <b>Zn (mg)</b>                       | 61.7%                   | 78.6%                        | 82.6%                    | <0.0001        |
| <b>Iron (mg)</b>                     | 84.5%                   | 92.7%                        | 96.3%                    | <0.0001        |
| <b>P (mg)</b>                        | 32.1%                   | 52.8%                        | 62.6%                    | <0.0001        |
| <b>K (mg) <sup>2</sup></b>           | 0.1%                    | 0.0%                         | 0.4%                     | 0.2452         |

<sup>1</sup> Low, moderate, high: <25%, 25%–<50%, ≥50% of the recommended 5 one-ounce servings of total meat/day derived from red meat; <sup>2</sup> Percent meeting AI for potassium (K); <sup>3</sup> Low, moderate, high: <20%, 20%–<40%, ≥40% of the recommended 5 one-ounce servings of total meat/day derived from white meat;

<sup>4</sup> Low, moderate, high: <10%, 10%–<20%, ≥20% of the recommended 5 one-ounce servings of total meat/day derived from soy, nuts, legumes, eggs.

**Supplemental Table S5.** Percent of 14–18 year-old girls meeting Estimated Average Requirements (EAR) for micronutrients according to grain subgroup intake.

|                            | <i>Whole grain intake</i>   |                              |                          | <i>p-value</i> |
|----------------------------|-----------------------------|------------------------------|--------------------------|----------------|
|                            | <b>Low <sup>1</sup></b>     | <b>Moderate <sup>1</sup></b> | <b>High <sup>1</sup></b> |                |
|                            | <i>n = 999</i>              | <i>n = 532</i>               | <i>n = 570</i>           |                |
| <b>Vit A (RAE)</b>         | 37.5%                       | 59.6%                        | 74.7%                    | <0.0001        |
| <b>Vit B6 (mg)</b>         | 73.9%                       | 84.6%                        | 91.1%                    | <0.0001        |
| <b>Vit B12 (µg)</b>        | 82.1%                       | 86.7%                        | 86.5%                    | 0.0180         |
| <b>Vit C (mg)</b>          | 70.1%                       | 80.6%                        | 85.1%                    | <0.0001        |
| <b>Vit D (µg)</b>          | 0.8%                        | 2.1%                         | 5.6%                     | <0.0001        |
| <b>Vit E (mg)</b>          | 1.9%                        | 2.6%                         | 3.0%                     | 0.3645         |
| <b>Ca (mg)</b>             | 6.4%                        | 9.8%                         | 21.2%                    | <0.0001        |
| <b>Mg (mg)</b>             | 3.1%                        | 7.0%                         | 21.2%                    | <0.0001        |
| <b>Zn (mg)</b>             | 63.7%                       | 70.5%                        | 80.4%                    | <0.0001        |
| <b>Iron (mg)</b>           | 82.3%                       | 93.1%                        | 96.0%                    | <0.0001        |
| <b>P (mg)</b>              | 32.0%                       | 46.4%                        | 58.3%                    | <0.0001        |
| <b>K (mg) <sup>2</sup></b> | 0.1%                        | 0.0%                         | 0.2%                     | 0.6391         |
|                            | <i>Refined grain intake</i> |                              |                          | <i>p-value</i> |
|                            | <b>Low <sup>3</sup></b>     | <b>Moderate <sup>3</sup></b> | <b>High <sup>3</sup></b> |                |
|                            | <i>n = 559</i>              | <i>n = 667</i>               | <i>n = 875</i>           |                |
| <b>Vit A (RAE)</b>         | 36.9%                       | 52.0%                        | 64.6%                    | <0.0001        |
| <b>Vit B6 (mg)</b>         | 66.4%                       | 81.1%                        | 90.9%                    | <0.0001        |
| <b>Vit B12 (µg)</b>        | 76.2%                       | 83.2%                        | 90.6%                    | <0.0001        |
| <b>Vit C (mg)</b>          | 67.8%                       | 77.7%                        | 81.9%                    | <0.0001        |
| <b>Vit D (µg)</b>          | 1.8%                        | 1.4%                         | 3.7%                     | 0.0074         |
| <b>Vit E (mg)</b>          | 1.6%                        | 1.8%                         | 3.3%                     | 0.0583         |
| <b>Ca (mg)</b>             | 3.9%                        | 7.8%                         | 18.6%                    | <0.0001        |
| <b>Mg (mg)</b>             | 2.7%                        | 5.3%                         | 15.9%                    | <0.0001        |
| <b>Zn (mg)</b>             | 49.2%                       | 67.6%                        | 84.9%                    | <0.0001        |
| <b>Iron (mg)</b>           | 65.1%                       | 93.9%                        | 99.9%                    | <0.0001        |
| <b>P (mg)</b>              | 16.3%                       | 36.6%                        | 64.5%                    | <0.0001        |
| <b>K (mg) <sup>2</sup></b> | 0.2%                        | 0.0%                         | 0.1%                     | 0.5825         |

<sup>1</sup> Low, moderate, high intakes: <5%, 5%–<10%, ≥10% of the recommended 6 servings of total grains/day derived from whole grains; <sup>2</sup> Percent meeting AI for potassium (K); <sup>3</sup> Low, moderate, high intakes: <75%, 75%–<100%, ≥100% of the recommended 6 servings of total grains/day derived from refined grains.

**Supplemental Figure S1.** Percent of 14–18 year-old girls meeting EAR according to combined effects of dairy and whole grains. Low (vs. high) dairy: <75% (vs.  $\geq 75\%$ ) of recommended 3 dairy servings/day. Low (vs. high) whole grain intake: <10% (vs.  $\geq 10\%$ ) of recommended 6 servings of total grains/day were derived from whole grains.

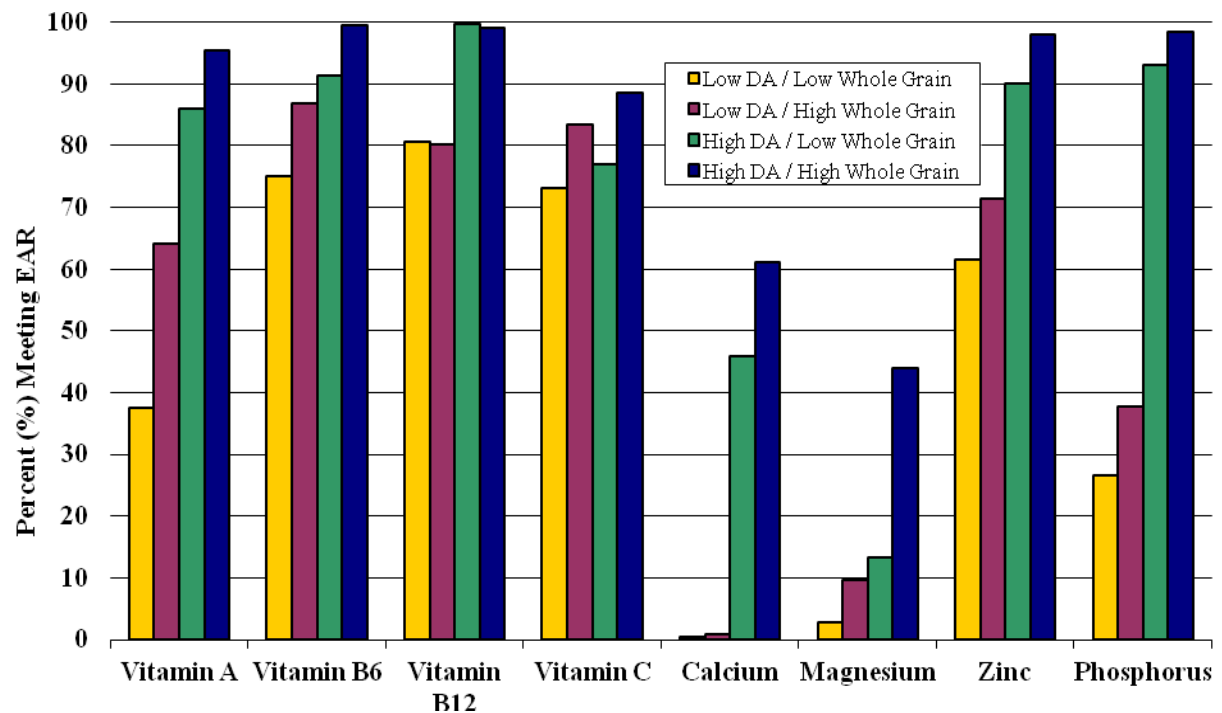

**Supplemental Figure S2.** Percent of 14–18 year-old girls meeting EAR according to combined effects of red meat and whole grains. Low (vs. high) red meat: <50% (vs.  $\geq$ 50%) of recommended 5 one-ounce servings of total meat/day. Low (vs. high) whole grain intake: <10% (vs.  $\geq$ 10%) of recommended 6 servings of total grains/day were derived from whole grains.

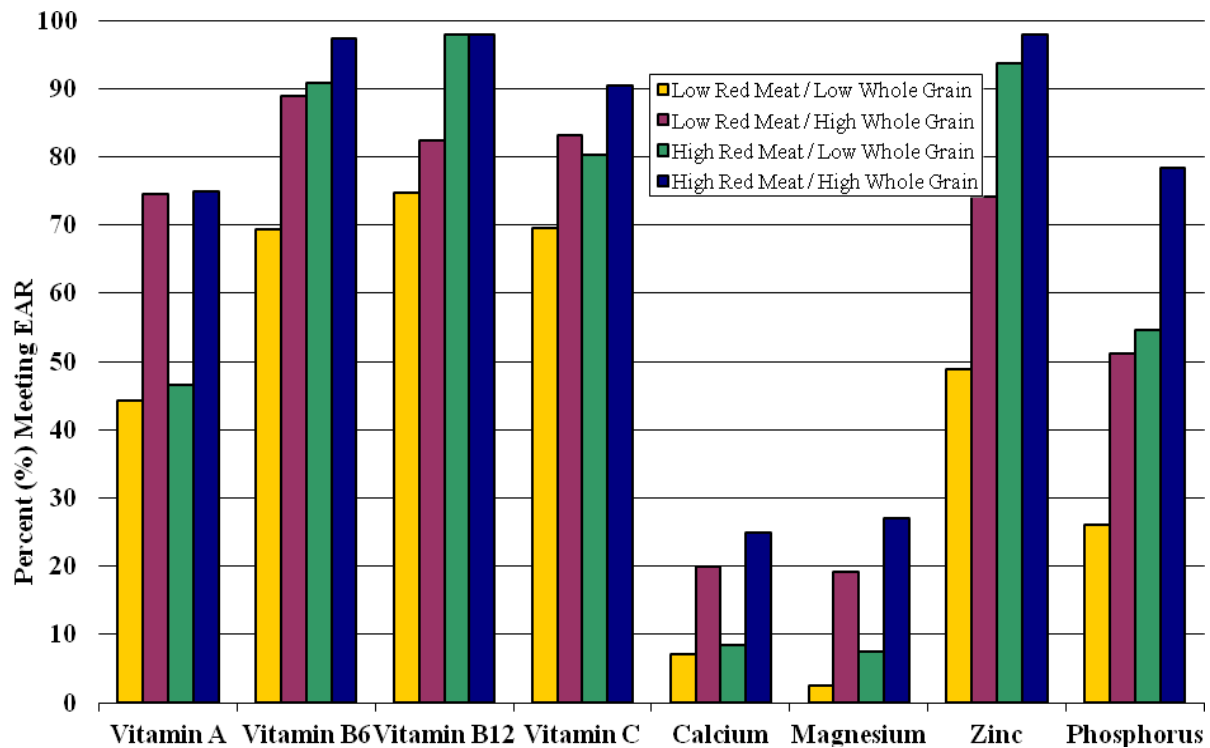

**Supplemental Figure S3.** Percent of 14–18 year-old girls meeting EAR according to combined effects of white meat (poultry and fish) and whole grains. Low (vs. high) white meat: <40% (vs.  $\geq$ 40%) of recommended 5 one-ounce servings of total meat/day. Low (vs. high) whole grain intake: <10% (vs.  $\geq$ 10%) of recommended 6 servings of total grains/day were derived from whole grains.

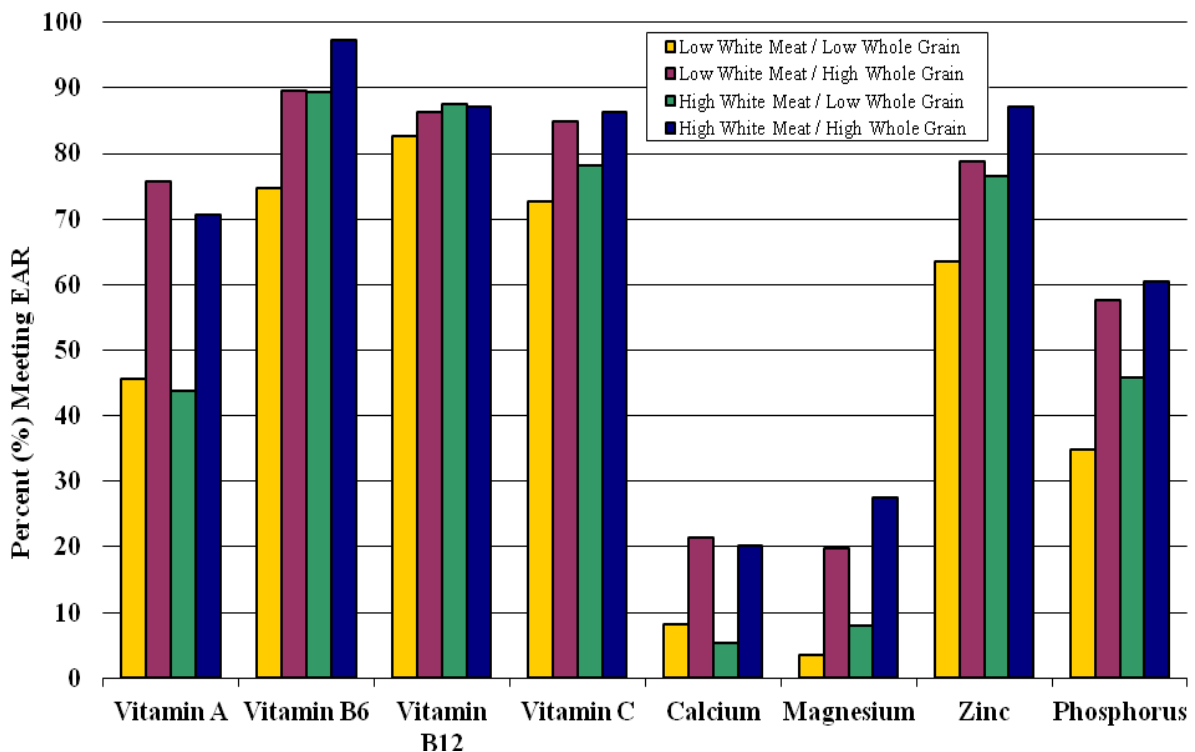

**Supplemental Figure S4.** Percent of 14–18 year-old girls meeting EAR according to combined effects of non-meat protein (eggs, soy, nuts, and legumes) and whole grains. Low (vs. high) non-meat protein: <10% (vs.  $\geq 10\%$ ) of recommended 5 one-ounce servings of total meat/day. Low (vs. high) whole grain intake: <10% (vs.  $\geq 10\%$ ) of recommended 6 servings of total grains/day were derived from whole grains.

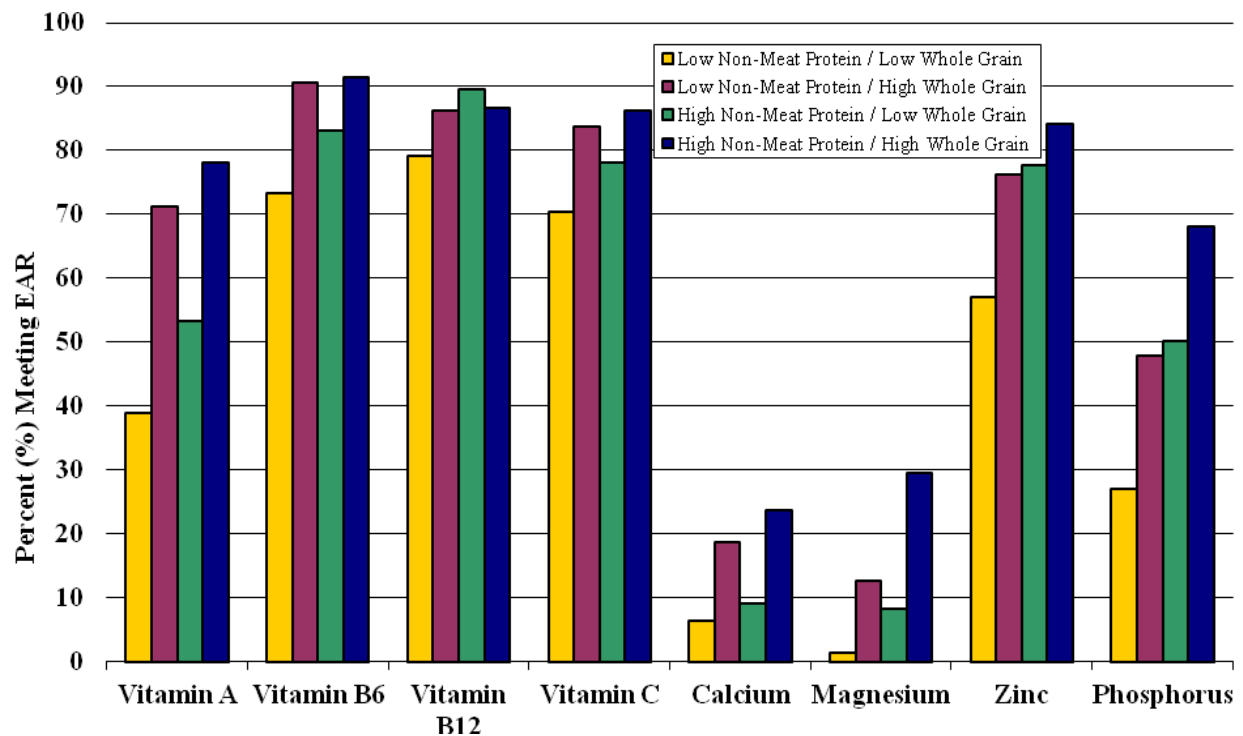

**Supplemental Figure S5.** Percent of 14–18 year-old girls meeting EAR according to combined effects of non-meat protein (eggs, soy, nuts, and legumes) and fruits and vegetables. Low (vs. high) non-meat protein: <10% (vs.  $\geq 10\%$ ) of recommended 5 one-ounce servings of total meat/day. Low (vs. high) fruit and vegetable intake: <50% (vs.  $\geq 50\%$ ) of recommended 8 servings of total fruit and vegetables/day.

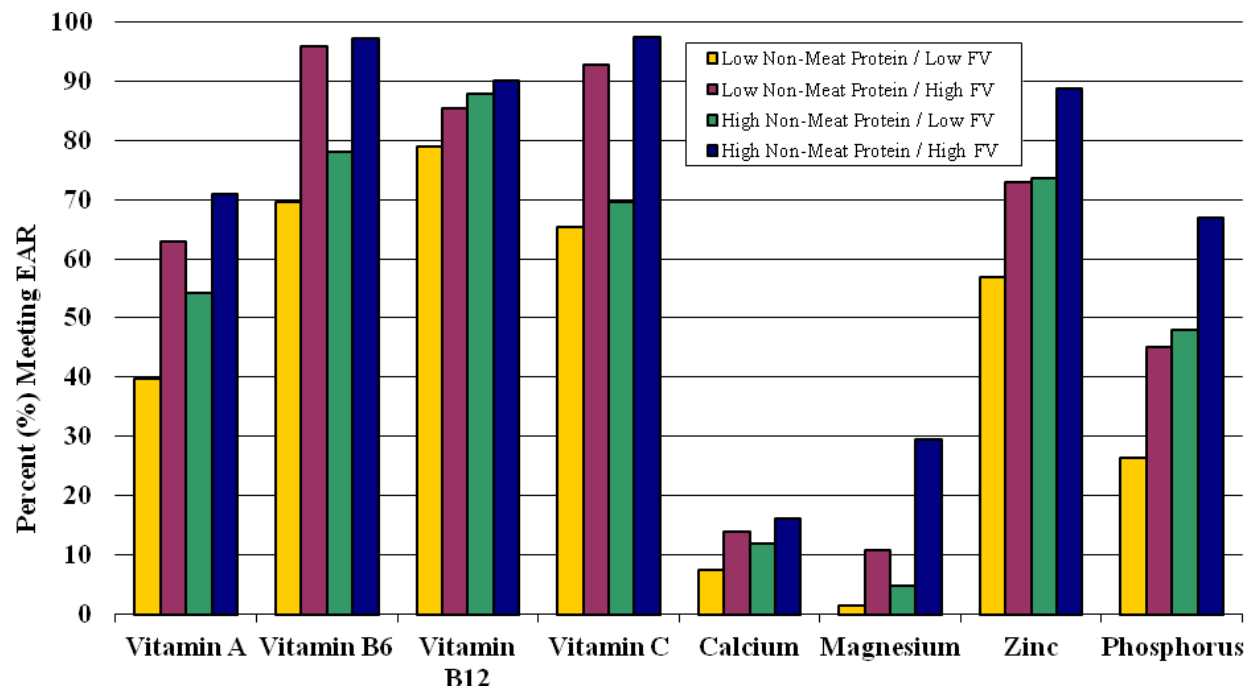

Supplement: Supplementary File 1: — Supplementary File (PDF, 294 KB) [file nutrients-04-01692-s001.pdf]
